# Supplementary material for: Responses of yield formation and anthocyanin biosynthesis of red rice to salt stress
Source: Research Square preprint supplement (doi:10.21203/rs.3.rs-6774866/v1), 2025-06-11
Supplement: Supplementary file 1 [file a1fa8437a0f233ab2706e034.docx]

**Table S1.**Physical and chemical characteristics of soil in experimental field

| Organic matter | Total N | Available P | Available K | pH |
| --- | --- | --- | --- | --- |
| g kg−1 | g kg−1 | mg kg−1 | mg kg−1 |  |
| 25.85 | 1.6 | 99.6 | 64.5 | 7.37 |

**Table S2.** Sequences of the q-PCR primers used in this study

| **Gene ID** | **primer_F** | **primer_R** |
| --- | --- | --- |
| *EF1α* | CTTGGTGTGAAGCAGATG | GGTGGACCTCTCAATCAT |
| *LOC4330034-PAL* | ATCACCAAGTTCGAGGAG | GAACACCTTGTTGCACTC |
| *LOC4330407-4CL* | GACGACGAGGTCTTCATC | CCTTGTGTAGCCTCTTGT |

**Table S3.** Information of 108 anthocyanins

| Number | Compounds | Class | Molecular Weight | Ion mode | Ionization model | Formula |
| --- | --- | --- | --- | --- | --- | --- |
| 1 | Cyanidin-3-O-glucoside | Cyanidin | 449.1083865 | Positive | [M]+ | C21H21O11+ |
| 2 | Cyanidin-3-O-(6-O-malonyl-beta-D-glucoside) | Cyanidin | 535.1087804 | Positive | [M]+ | C24H23O14+ |
| 3 | Cyanidin-3-O-sambubioside-5-O-glucoside | Cyanidin | 743.2034686 | Positive | [M]+ | C32H39O20+ |
| 4 | Cyanidin-3-O-5-O-(6-O-coumaroyl)-diglucoside | Cyanidin | 757.1979893 | Positive | [M]+ | C36H37O18+ |
| 5 | Cyanidin-3,5,3'-O-triglucoside | Cyanidin | 773.2140333 | Positive | [M]+ | C33H41O21+ |
| 6 | Cyanidin-3-(6-O-p-caffeoyl)-glucoside | Cyanidin | 611.1400805 | Positive | [M]+ | C30H27O14+ |
| 7 | Cyanidin-3-O-rutinoside-5-O-glucoside | Cyanidin | 757.2191187 | Positive | [M]+ | C33H41O20+ |
| 8 | Cyanidin-3-O-rutinoside | Cyanidin | 595.1662953 | Positive | [M]+ | C27H31O15+ |
| 9 | Cyanidin-3-O-(6-O-p-coumaroyl)-glucoside | Cyanidin | 595.1451659 | Positive | [M]+ | C30H27O13+ |
| 10 | Cyanidin-3-O-(6''-ferulylsophoroside)-5-glucoside | Cyanidin | 949.2613774 | Positive | [M]+ | C43H49O24+ |
| 11 | Cyanidin-3,5-O-diglucoside | Cyanidin | 611.1612099 | Positive | [M]+ | C27H31O16+ |
| 12 | Cyanidin-3-O-xyloside | Cyanidin | 419.0978218 | Positive | [M]+ | C20H19O10+ |
| 13 | Cyanidin-3-O-sophoroside | Cyanidin | 611.1612099 | Positive | [M]+ | C27H31O16+ |
| 14 | Cyanidin-3-O-sambubioside | Cyanidin | 581.1506452 | Positive | [M]+ | C26H29O15+ |
| 15 | Cyanidin-3-(6''-caffeylsophoroside)-5-glucoside | Cyanidin | 935.2457274 | Positive | [M]+ | C42H47O24+ |
| 16 | Cyanidin-3-O-galactoside | Cyanidin | 449.1083865 | Positive | [M]+ | C21H21O11+ |
| 17 | Cyanidin-3-O-arabinoside | Cyanidin | 419.0978218 | Positive | [M]+ | C20H19O10+ |
| 18 | Delphinidin-3-O-glucoside | Delphinidin | 465.1033011 | Positive | [M]+ | C21H21O12+ |
| 19 | Delphinidin-3-O-galactoside | Delphinidin | 465.1033011 | Positive | [M]+ | C21H21O12+ |
| 20 | Delphinidin-3,5-O-diglucoside | Delphinidin | 627.1561245 | Positive | [M]+ | C27H31O17+ |
| 21 | Delphinidin-3-O-rutinoside-5-O-glucoside | Delphinidin | 773.2140333 | Positive | [M]+ | C33H41O21+ |
| 22 | Delphinidin | Delphinidin | 303.0504777 | Positive | [M]+ | C15H11O7+ |
| 23 | Delphinidin-3-O-(6-O-malonyl)-glucoside-3'-glucoside | Delphinidin | 713.1565184 | Positive | [M]+ | C30H33O20+ |
| 24 | Delphinidin-3-O-arabinoside | Delphinidin | 435.0927364 | Positive | [M]+ | C20H19O11+ |
| 25 | Delphinidin-3-O-(6-O-p-coumaroyl)-glucoside | Delphinidin | 611.1400805 | Positive | [M]+ | C30H27O14+ |
| 26 | Delphinidin-3-O-(6-O-acetyl)-glucoside | Delphinidin | 507.1138658 | Positive | [M]+ | C23H23O13+ |
| 27 | Delphinidin-3-O-sambubioside-5-O-glucoside | Delphinidin | 759.1983833 | Positive | [M]+ | C32H39O21+ |
| 28 | Delphinidin-3-O-sambubioside | Delphinidin | 597.1455598 | Positive | [M]+ | C26H29O16+ |
| 29 | Delphinidin-3-O-rutinoside | Delphinidin | 611.1612099 | Positive | [M]+ | C27H31O16+ |
| 30 | Delphinidin-3-O-rhamnoside | Delphinidin | 449.10839 | Positive | [M]+ | C21H21O11+ |
| 31 | Delphinidin-3-O-(6-O-malonyl-beta-D-glucoside) | Delphinidin | 551.103695 | Positive | [M]+ | C24H23O15+ |
| 32 | Delphinidin-3-O-5-O-(6-O-coumaroyl)-diglucoside | Delphinidin | 773.192904 | Positive | [M]+ | C36H37O19+ |
| 33 | Delphinidin-3-O-sophoroside | Delphinidin | 627.1561245 | Positive | [M]+ | C27H31O17+ |
| 34 | Malvidin-3-O-(6''-acetylglucoside)-5-glucoside | Malvidin | 697.1979893 | Positive | [M]+ | C31H37O18+ |
| 35 | Malvidin | Malvidin | 331.0817778 | Positive | [M]+ | C17H15O7+ |
| 36 | Malvidin-3-O-(6-O-malonyl-beta-D-glucoside) | Malvidin | 579.1349952 | Positive | [M]+ | C26H27O15+ |
| 37 | Malvidin-3-O-sambubioside | Malvidin | 625.17686 | Positive | [M]+ | C28H33O16+ |
| 38 | Malvidin-3-O-sophoroside | Malvidin | 655.1874246 | Positive | [M]+ | C29H35O17+ |
| 39 | Malvidin-3-O-5-O-(6-O-coumaroyl)-diglucoside | Malvidin | 801.2242041 | Positive | [M]+ | C38H41O19+ |
| 40 | Malvidin-3,5-O-diglucoside | Malvidin | 655.1874246 | Positive | [M]+ | C29H35O17+ |
| 41 | Malvidin-3-O-sambubioside-5-O-glucoside | Malvidin | 787.22969 | Positive | [M]+ | C34H43O21+ |
| 42 | Malvidin-3-O-arabinoside | Malvidin | 463.1240366 | Positive | [M]+ | C22H23O11+ |
| 43 | Malvidin-3-O-galactoside | Malvidin | 493.1346012 | Positive | [M]+ | C23H25O12+ |
| 44 | Malvidin-3-O-glucoside | Malvidin | 493.1346012 | Positive | [M]+ | C23H25O12+ |
| 45 | Malvidin-3-O-rutinoside | Malvidin | 639.19251 | Positive | [M]+ | C29H35O16+ |
| 46 | Malvidin-3-O-(6-O-p-coumaroyl)-glucoside | Malvidin | 639.1713807 | Positive | [M]+ | C32H31O14+ |
| 47 | Pelargonidin-3-O-arabinoside | Pelargonidin | 403.1029072 | Positive | [M]+ | C20H19O9+ |
| 48 | Pelargonidin-3-O-(6-O-p-coumaroyl)-glucoside | Pelargonidin | 579.1502513 | Positive | [M]+ | C30H27O12+ |
| 49 | Pelargonidin-3-O-sambubioside | Pelargonidin | 565.1557306 | Positive | [M]+ | C26H29O14+ |
| 50 | Pelargonidin-3-O-sambubioside-5-O-glucoside | Pelargonidin | 727.208554 | Positive | [M]+ | C32H39O19+ |
| 51 | Pelargonidin-3-O-rutinoside-5-O-glucoside | Pelargonidin | 741.2242041 | Positive | [M]+ | C33H41O19+ |
| 52 | Pelargonidin-3-O-sophoroside | Pelargonidin | 595.1662953 | Positive | [M]+ | C27H31O15+ |
| 53 | Pelargonidin-3-O-[6-O-feruloyl-2-O-glucosyl-glucoside]-5-O-glucoside | Pelargonidin | 933.2664628 | Positive | [M]+ | C43H49O23+ |
| 54 | Pelargonidin-3-O-(6''-ferulylsambubioside)-5-O-(malonyl)-glucoside | Pelargonidin | 989.256292 | Positive | [M]+ | C45H49O25+ |
| 55 | Pelargonidin-3-(6''-caffeylsophoroside)-5-glucoside | Pelargonidin | 919.2508127 | Positive | [M]+ | C42H47O23+ |
| 56 | Pelargonidin | Pelargonidin | 271.0606485 | Positive | [M]+ | C15H11O5+ |
| 57 | Pelargonidin-3-O-glucoside | Pelargonidin | 433.1134719 | Positive | [M]+ | C21H21O10+ |
| 58 | Pelargonidin-3-O-rutinoside | Pelargonidin | 579.1713807 | Positive | [M]+ | C27H31O14+ |
| 59 | Pelargonidin-3-O-sophoroside-5-O-(malonyl)-glucoside | Pelargonidin | 843.21952 | Positive | [M]+ | C36H43O23+ |
| 60 | Pelargonidin-3-O-galactoside | Pelargonidin | 433.1134719 | Positive | [M]+ | C21H21O10+ |
| 61 | Pelargonidin-3-O-5-O-(6-O-coumaroyl)-diglucoside | Pelargonidin | 741.2030747 | Positive | [M]+ | C36H37O17+ |
| 62 | Pelargonidin-3-sophoroside-5-glucoside | Pelargonidin | 757.2191187 | Positive | [M]+ | C33H41O20+ |
| 63 | Pelargonidin-3-O-[2-O-glucosyl-6-O-p-coumaroyl-glucoside]-5-O-glucoside | Pelargonidin | 903.2558981 | Positive | [M]+ | C42H47O22+ |
| 64 | Pelargonidin-3,5-O-diglucoside | Pelargonidin | 595.1662953 | Positive | [M]+ | C27H31O15+ |
| 65 | Pelargonidin-3-O-(6-O-malonyl-beta-D-glucoside) | Pelargonidin | 519.1138658 | Positive | [M]+ | C24H23O13+ |
| 66 | Peonidin-3-O-(6-O-p-coumaroyl)-glucoside | Peonidin | 609.160816 | Positive | [M]+ | C31H29O13+ |
| 67 | Peonidin-3-O-sambubioside-5-O-glucoside | Peonidin | 757.2191187 | Positive | [M]+ | C33H41O20+ |
| 68 | Peonidin-3-O-arabinoside | Peonidin | 433.1134719 | Positive | [M]+ | C21H21O10+ |
| 69 | Peonidin-3-O-galactoside | Peonidin | 463.1240366 | Positive | [M]+ | C22H23O11+ |
| 70 | Peonidin-3-O-rutinoside | Peonidin | 609.1819453 | Positive | [M]+ | C28H33O15+ |
| 71 | Peonidin-3-O-glucoside | Peonidin | 463.1240366 | Positive | [M]+ | C22H23O11+ |
| 72 | Peonidin-3-O-sophoroside | Peonidin | 625.17686 | Positive | [M]+ | C28H33O16+ |
| 73 | Peonidin-3-O-(6''-ferulylsophoroside)-5-glucoside | Peonidin | 963.2770275 | Positive | [M]+ | C44H51O24+ |
| 74 | Peonidin-3-O-(6-O-malonyl-beta-D-glucoside) | Peonidin | 549.1244305 | Positive | [M]+ | C25H25O14+ |
| 75 | Peonidin-3,5-O-diglucoside | Peonidin | 625.17686 | Positive | [M]+ | C28H33O16+ |
| 76 | Peonidin-3-(caffeoyl-glucosyl-glucoside)-5-glucoside | Peonidin | 949.2613774 | Positive | [M]+ | C43H49O24+ |
| 77 | Peonidin-3-sophoroside-5-glucoside | Peonidin | 787.2296834 | Positive | [M]+ | C34H43O21+ |
| 78 | Peonidin-3-O-P-hydroxybenzoylsophoroside-5-glucoside | Peonidin | 907.25082 | Positive | [M]+ | C41H47O23+ |
| 79 | Peonidin-3-O-sambubioside | Peonidin | 595.1662953 | Positive | [M]+ | C27H31O15+ |
| 80 | Peonidin | Peonidin | 301.0712131 | Positive | [M]+ | C16H13O6+ |
| 81 | Peonidin-3-O-caffeoyl-feruloyl-sophoroside-5-glucoside | Peonidin | 1125.30873 | Positive | [M]+ | C53H57O27+ |
| 82 | Peonidin-3-O-5-O-(6-O-coumaroyl)-diglucoside | Peonidin | 771.2136394 | Positive | [M]+ | C37H39O18+ |
| 83 | Petunidin-3,5-O-diglucoside | Petunidin | 641.1717746 | Positive | [M]+ | C28H33O17+ |
| 84 | Petunidin-3-O-sambubioside-5-O-glucoside | Petunidin | 773.21404 | Positive | [M]+ | C33H41O21+ |
| 85 | Petunidin-3-O-sophoroside | Petunidin | 641.1717746 | Positive | [M]+ | C28H33O17+ |
| 86 | Petunidin-3-O-(6-O-p-coumaroyl)-glucoside | Petunidin | 625.1557306 | Positive | [M]+ | C31H29O14+ |
| 87 | Petunidin-3-O-galactoside | Petunidin | 479.1189512 | Positive | [M]+ | C22H23O12+ |
| 88 | Petunidin-3-O-sambubioside | Petunidin | 611.1612099 | Positive | [M]+ | C27H31O16+ |
| 89 | Petunidin-3-O-arabinoside | Petunidin | 449.1083865 | Positive | [M]+ | C21H21O11+ |
| 90 | Petunidin-3-O-glucoside | Petunidin | 479.1189512 | Positive | [M]+ | C22H23O12+ |
| 91 | Petunidin-3-O-rutinoside | Petunidin | 625.17686 | Positive | [M]+ | C28H33O16+ |
| 92 | Petunidin-3-O-(6-O-malonyl-beta-D-glucoside) | Petunidin | 565.1193451 | Positive | [M]+ | C25H25O15+ |
| 93 | Petunidin-3-O-5-O-(6-O-coumaroyl)-diglucoside | Petunidin | 787.208554 | Positive | [M]+ | C37H39O19+ |
| 94 | Procyanidin A1 | Procyanidin | 576.1267762 | Positive | [M+H]+ | C30H24O12 |
| 95 | Procyanidin B3 | Procyanidin | 578.1424263 | Positive | [M+H]+ | C30H26O12 |
| 96 | Procyanidin B2 | Procyanidin | 578.1424263 | Positive | [M+H]+ | C30H26O12 |
| 97 | Procyanidin B1 | Procyanidin | 578.1424263 | Positive | [M+H]+ | C30H26O12 |
| 98 | Procyanidin C1 | Procyanidin | 866.2058144 | Positive | [M+H]+ | C45H38O18 |
| 99 | Procyanidin A2 | Procyanidin | 576.1267762 | Positive | [M+H]+ | C30H24O12 |
| 100 | Rutin | flavonoid | 610.1533849 | Positive | [M+H]+ | C27H30O16 |
| 101 | Dihydromyricetin | flavonoid | 320.0532173 | Positive | [M+H]+ | C15H12O8 |
| 102 | Afzelin | flavonoid | 432.1056468 | Positive | [M+H]+ | C21H20O10 |
| 103 | Kaempferol-3-O-rutinoside | flavonoid | 594.1584703 | Positive | [M+H]+ | C27H30O15 |
| 104 | Naringenin | flavonoid | 272.0684735 | Positive | [M+H]+ | C15H12O5 |
| 105 | Naringenin-7-O-glucoside | flavonoid | 434.1212969 | Positive | [M+H]+ | C21H22O10 |
| 106 | Dihydrokaempferol | flavonoid | 288.0633881 | Positive | [M+H]+ | C15H12O6 |
| 107 | Chalcone | flavonoid | 208.088815 | Positive | [M+H]+ | C15H12O |
| 108 | Quercetin-3-O-glucoside | flavonoid | 464.0954761 | Positive | [M+H]+ | C21H20O12 |

**Table S4.** Statistics on the quality and output of the RNA-Seq

| Sample | Raw reads | Clean reads | clean data | Error rate | Q20 | Q30 | GC |
| --- | --- | --- | --- | --- | --- | --- | --- |
|  |  |  | Gbases | % | % | % | % |
| YXHD-CK-1 | 43272856 | 42282432 | 6.37 | 0.009028 | 98.58 | 96.15 | 49.17 |
| YXHD-CK-2 | 45577712 | 44550404 | 6.71 | 0.009855 | 98.6 | 96.23 | 49.32 |
| YXHD-CK-3 | 39902920 | 38938900 | 5.87 | 0.009918 | 98.5 | 95.95 | 49.29 |
| TDH2-CK-1 | 42174414 | 41229594 | 6.21 | 0.009939 | 98.49 | 95.86 | 50.97 |
| TDH2-CK-2 | 54268178 | 53228716 | 8.02 | 0.009655 | 98.67 | 96.33 | 50.34 |
| TDH2-CK-3 | 49379876 | 48213534 | 7.26 | 0.008857 | 98.44 | 95.73 | 50.69 |
| YXHD-T1-1 | 40155132 | 39151676 | 5.89 | 0.009791 | 98.45 | 95.81 | 50.42 |
| YXHD-T1-2 | 41998938 | 41096602 | 6.19 | 0.008344 | 98.69 | 96.47 | 50.03 |
| YXHD-T1-3 | 45273248 | 44225832 | 6.65 | 0.010057 | 98.53 | 96.05 | 49.96 |
| TDH2-T1-1 | 42163384 | 41167056 | 6.2 | 0.006914 | 98.51 | 95.99 | 49.4 |
| TDH2-T1-2 | 41431306 | 40539900 | 6.11 | 0.006823 | 98.62 | 96.25 | 49.1 |
| TDH2-T1-3 | 40339714 | 39484678 | 5.95 | 0.006879 | 98.61 | 96.18 | 49.41 |
| YXHD-T2-1 | 45161100 | 44156100 | 6.65 | 0.009604 | 98.62 | 96.27 | 49.68 |
| YXHD-T2-2 | 44812342 | 43629678 | 6.57 | 0.010125 | 98.43 | 95.8 | 49.97 |
| YXHD-T2-3 | 43291206 | 42319728 | 6.37 | 0.009814 | 98.58 | 96.16 | 50.23 |
| TDH2-T2-1 | 54458696 | 53314178 | 8.03 | 0.006828 | 98.55 | 96.04 | 50.22 |
| TDH2-T2-2 | 46675222 | 45646464 | 6.87 | 0.006854 | 98.48 | 95.84 | 50.37 |
| TDH2-T2-3 | 42955732 | 42095118 | 6.34 | 0.006879 | 98.58 | 96.08 | 50.08 |

YXHD, Youxianghongdao; TDH2, Tiandaohong2. CK, T1, and T2 represent freshwater irrigation and brine irrigation with salinity of 2.0‰ and 4.0‰, respectively


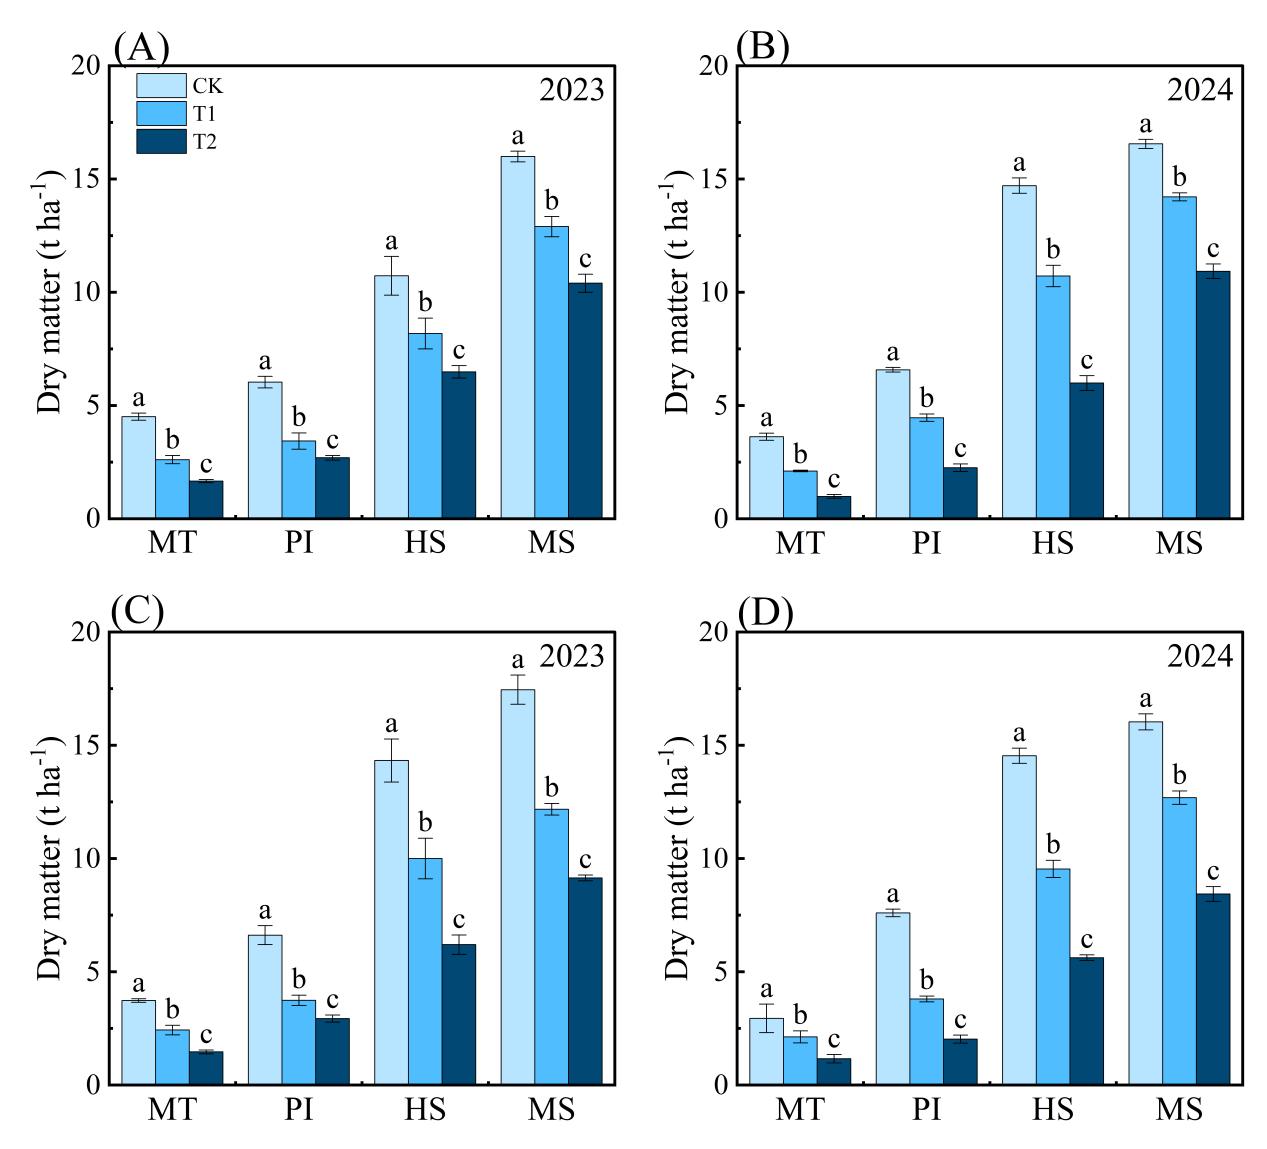


**Fig. S1.** Effects of salt stress on dry matter accumulation of YXHD (A-B) and TDH2 (C-D) at main growth stages in 2023 and 2024

Mean values with the same letters are significantly different at P < 0.05 according to the LSD test. YXHD, Youxianghongdao; TDH2, Tiandaohong2. MT, middle tillering stage; PI, panicle initiation stage; HS, full heading stage; MS, maturity stage. The CK, T1 and T2 represent freshwater irrigation, seawater and freshwater mixtures with salinity of 2‰ and 4‰, respectively.


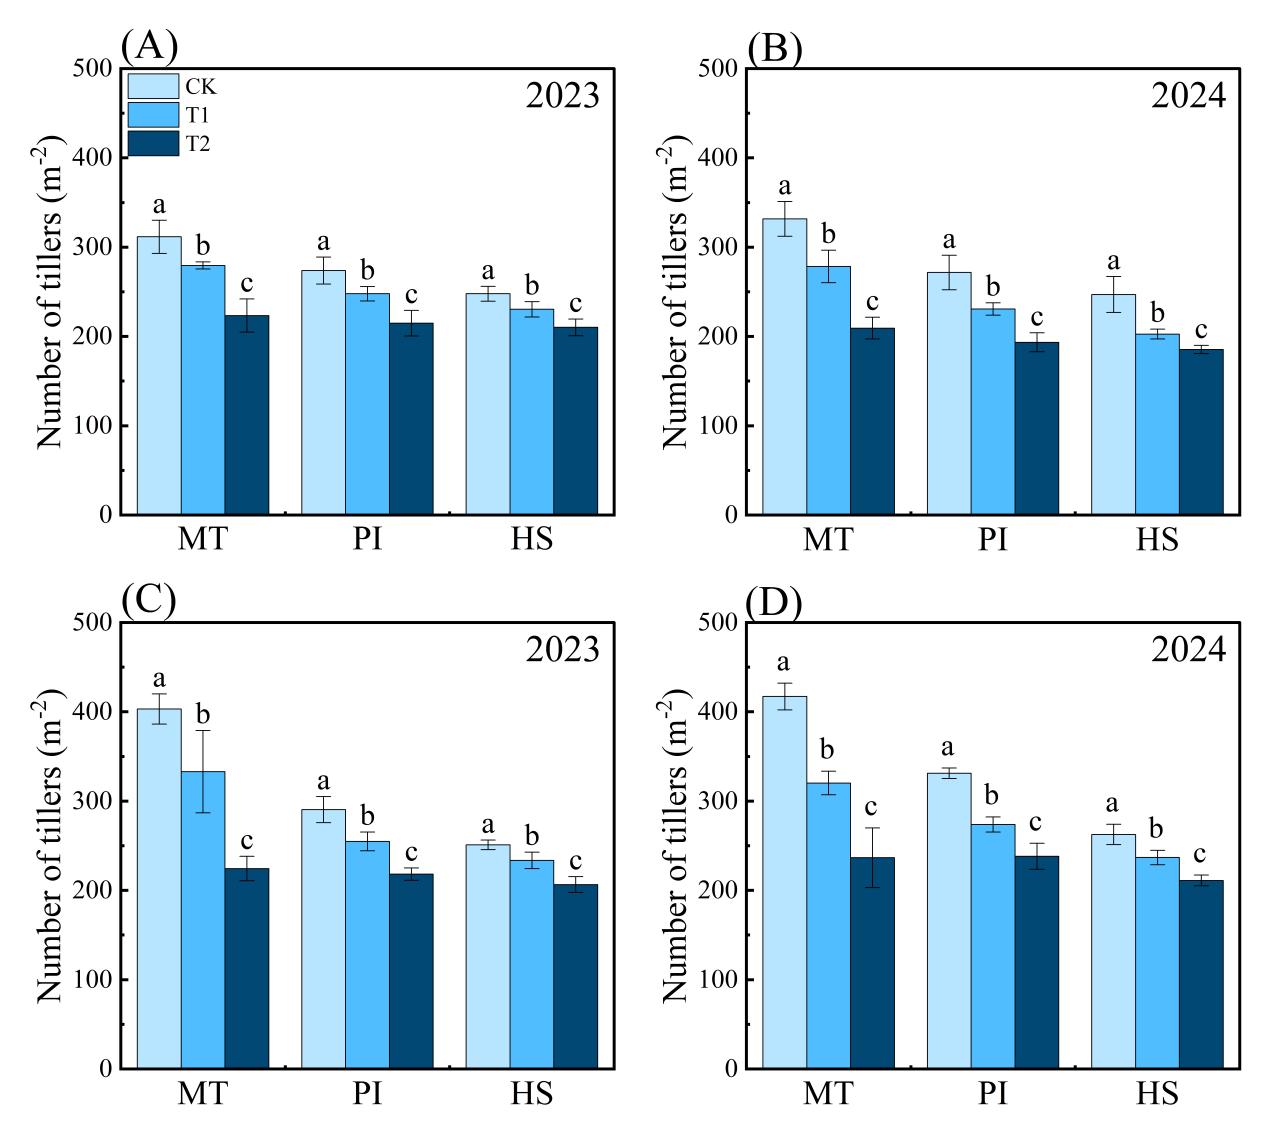


**Fig. S2.** Effects of salt stress on tiller number of YXHD (A-B) and TDH2 (C-D) at main growth stages in 2023 and 2024

Mean values with the same letters are significantly different at P < 0.05 according to the LSD test. YXHD, Youxianghongdao; TDH2, Tiandaohong2. MT, middle tillering stage; PI, panicle initiation stage; HS, full heading stage. The CK, T1 and T2 represent freshwater irrigation, seawater and freshwater mixtures with salinity of 2‰ and 4‰, respectively.


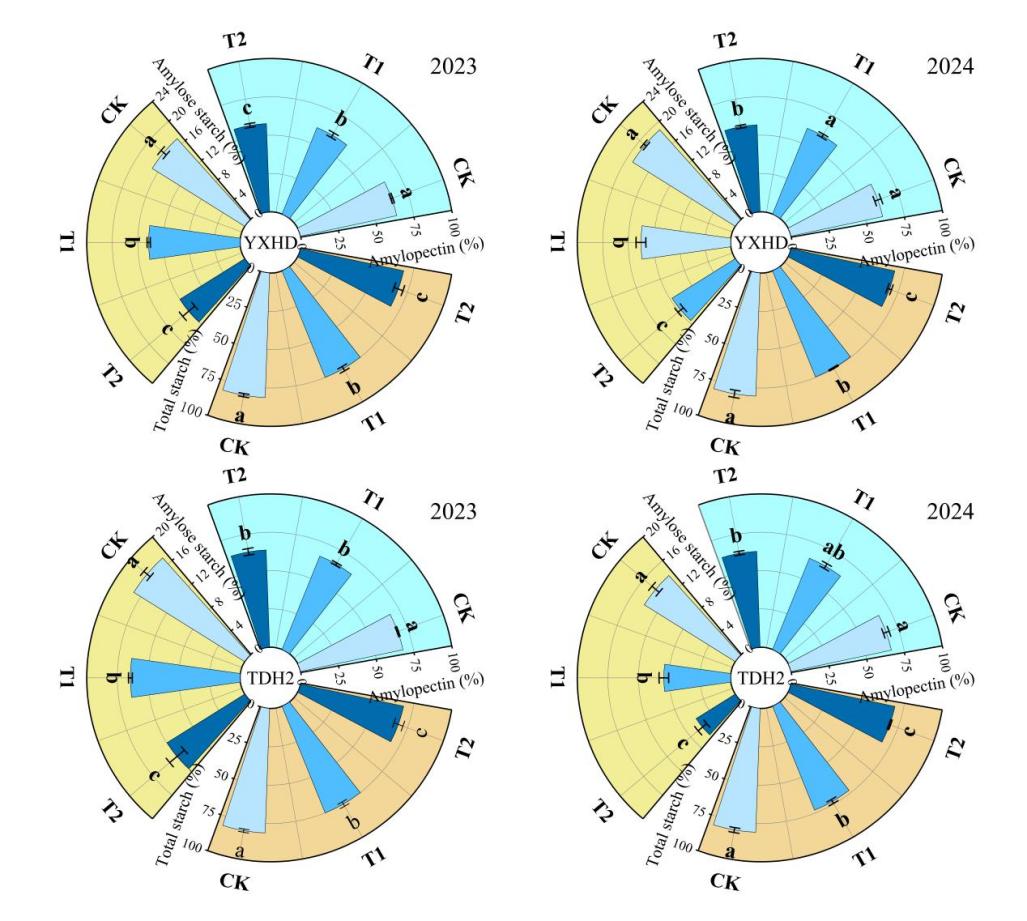


**Fig. S3**. Effects of brine irrigation on the contents of starch and its components in red grains. Mean values of different lowercase letters were significantly different at the P < 0.05 level by LSD test. YXHD, Youxianghongdao; TDH2, Tiandaohong2. CK, T1, and T2 represent freshwater irrigation and brine irrigation with salinity of 2.0‰ and 4.0‰, respectively


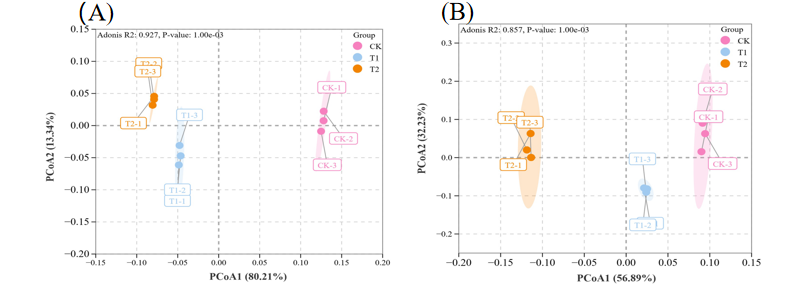


**Fig. S4**. Principal component analysis of transcriptome data of YXHD (Youxianghongdao) and TDH2 (Tiandaohong 2). A and B are the PCoA diagrams of YXHD (Youxianghongdao) and TDH2 (Tiandaohong2), respectively. CK, T1, and T2 represent freshwater irrigation and brine irrigation with salinity of 2.0‰ and 4.0‰, respectively


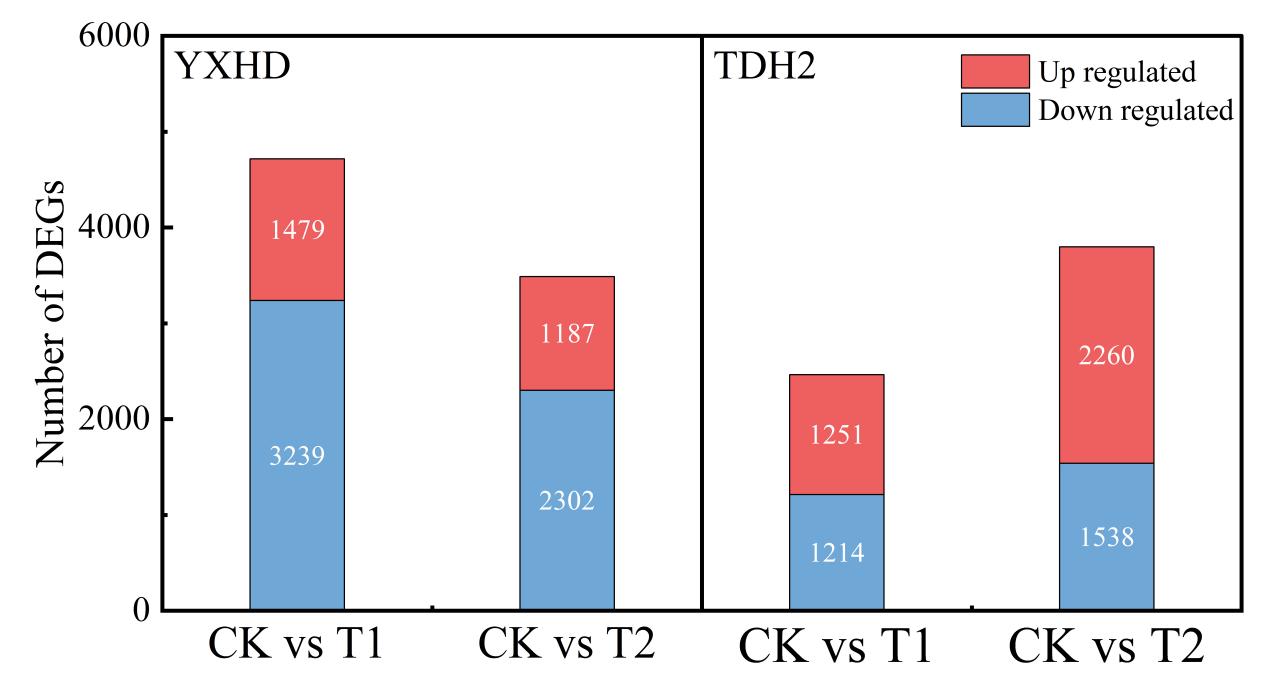


**Fig. S5**. Statistics of differential genes in red rice under brine irrigation. YXHD, Youxianghongdao; TDH2, Tiandaohong2. CK, T1, and T2 represent freshwater irrigation and brine irrigation with salinity of 2.0‰ and 4.0‰, respectively.


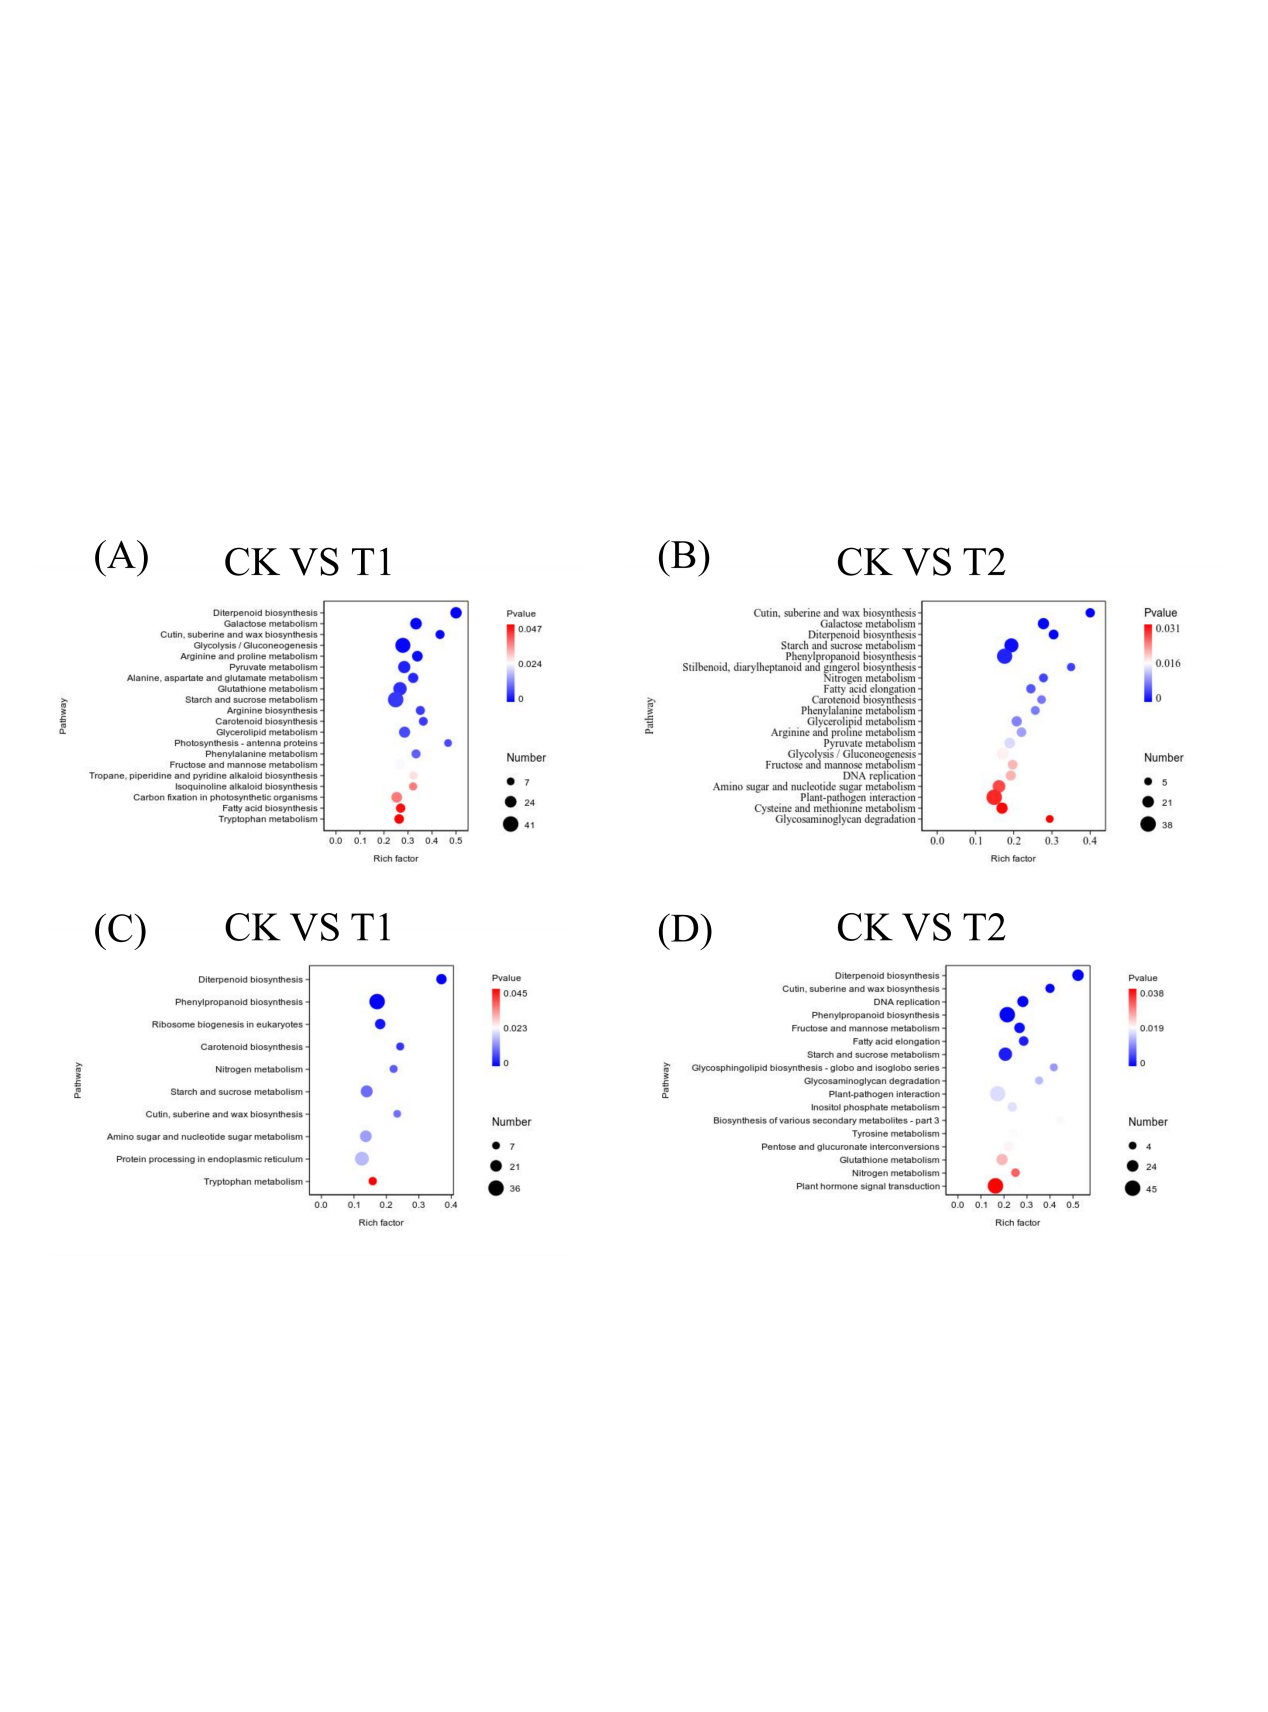


**Fig. S6**. KEGG pathway enrichment of differentially expressed gene (DEGs) of YXHD (Youxianghongdao) and TDH2 (Tiandaohong2). (A and B) KEGG pathways analysis of DEGs in YXHD (Youxianghongdao) treated with 2.0‰ brine irrigation (T1) and 4.0‰ brine irrigation (T2) compared with freshwater irrigation (CK). (C and D) KEGG pathways analysis of DEGs in TDH2 (Tiandaohong2) treated with 2.0‰ brine irrigation (T1) and 4.0‰ brine irrigation (T2) compared with freshwater irrigation (CK)


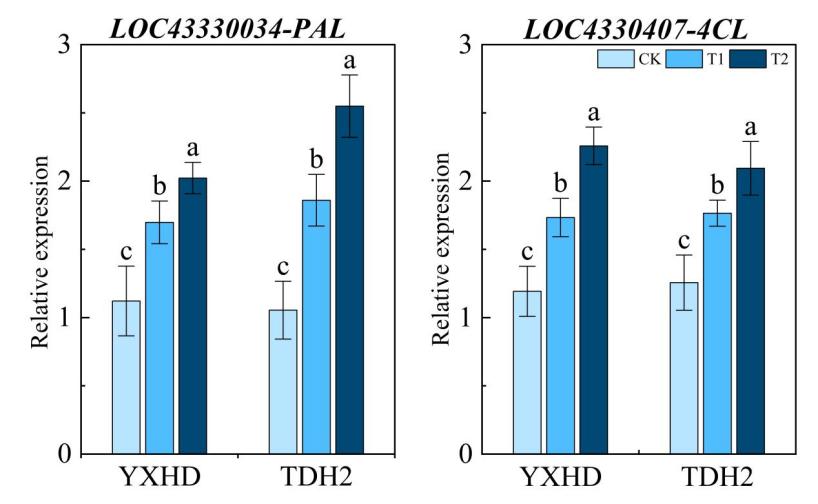


**Fig. S7**. Effects of brine irrigation on the relative expression of *PAL* and *4CL* in YXHD (Youxianghongdao) and TDH2 (Tiandaohong2). Mean values of different lowercase letters were significantly different at the P < 0.05 level by LSD test. *PAL*, phenylalanine ammonia lyase gene; *4CL*, 4-coumaroyl-coenzyme A ligase gene. CK, T1, and T2 represent freshwater irrigation and brine irrigation with salinity of 2.0‰ and 4.0‰, respectively.
